# Supplementary material for: DeNOxperformance enhancement of Cu-based oxidesviaemploying a TiO2phase to modify LDH precursors
Source: Royal Society of Chemistry journal article supplement (doi:10.1039/d2ra00316c), 2022-01-01
Supplement: d2ra00316c1.pdf [file d2ra00316c1.pdf]

## Electronic Supplementary Information

### DeNO<sub>x</sub> performance enhancement of Cu-based oxides via employing TiO<sub>2</sub> phase to modify LDHs precursor

Yali Du<sup>a,1</sup>, Xuezhen Liu<sup>a,b,1</sup>, Jiangning Liu<sup>b</sup>, Rongting Du<sup>b</sup>, Xu Wu<sup>b,c,\*</sup>

<sup>a</sup> College of Chemistry and Chemical Engineering, Jinzhong University, Jinzhong 030619, P. R. China.

<sup>b</sup> College of Chemistry and Chemical Engineering, Taiyuan University of Technology, Taiyuan 030024, P. R. China.

<sup>c</sup> Shanxi Huadun Industrial Co., Ltd, Taiyuan 030062, China.

\* Corresponding authors, Tel.& Fax: +86-0351-6018528, E-mail address: [wuxu@tyut.edu.cn](mailto:wuxu@tyut.edu.cn) (X. Wu).

<sup>1</sup> These authors contributed equally to this work.

## Figure captions

**Fig. S1** Experimental configurations for evaluating of catalytic performance

**Fig.S2** NO<sub>x</sub> conversion as a function of temperature over CuAl-LDO/TiO<sub>2</sub>NTs catalyst in different rounds

**Fig. S3** In situ DRIFTS spectrum of SO<sub>2</sub> adsorption over (a) CuAl-LDO and (b) CuAl-LDO/TiO<sub>2</sub>NTs catalyst at 240 °C.

**Fig. S4** The TEM images of TiO<sub>2</sub>NTs (A, B).

**Fig. S5** (A) N<sub>2</sub> adsorption/desorption isotherms and (B) pore diameter distribution of catalysts

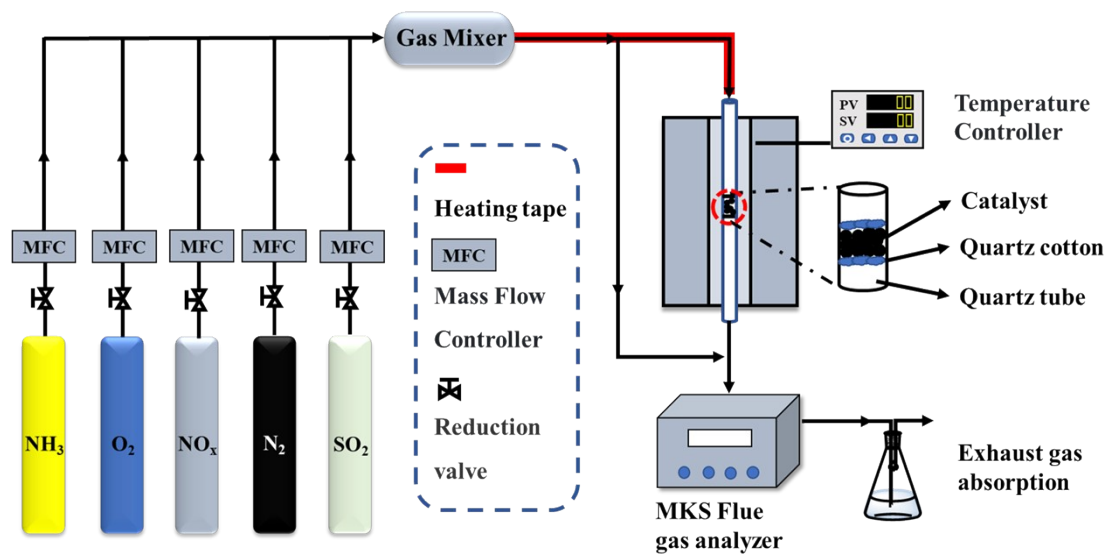

**Fig. S1** Experimental configurations for evaluating of catalytic performance

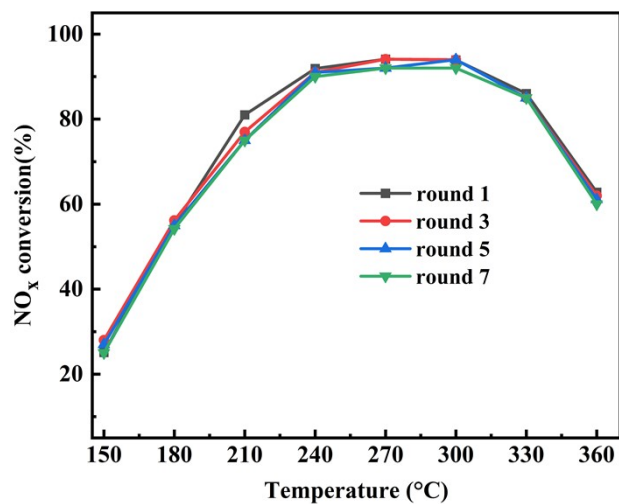

**Fig.S2** NO<sub>x</sub> conversion as a function of temperature over CuAl-LDO/TiO<sub>2</sub>NTs catalyst in different rounds

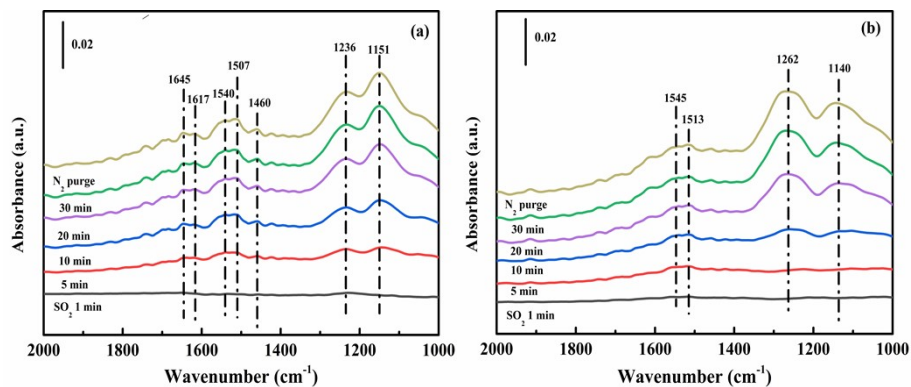

**Fig. S3** In situ DRIFTS spectrum of SO<sub>2</sub> adsorption over (a) CuAl-LDO and (b) CuAl-LDO/TiO<sub>2</sub>NTs catalyst at 240 °C.

The capacity of SO<sub>2</sub> adsorption over CuAl-LDO and CuAl-LDO/TiO<sub>2</sub>NTs catalysts were researched by In situ DRIFTS measurement and the results are shown in the Fig. S3. For CuAl-LDO catalyst, it could be seen that the bands at 1645 cm<sup>-1</sup>, 1617 cm<sup>-1</sup>, 1540 cm<sup>-1</sup>, 1507 cm<sup>-1</sup>, 1460 cm<sup>-1</sup>, 1236 cm<sup>-1</sup> and 1151 cm<sup>-1</sup> were detected, which were ascribed to the hydroxyl groups in the adsorbed water (1645 cm<sup>-1</sup> and 1617 cm<sup>-1</sup>), the surface bidentate sulfate species (1540 cm<sup>-1</sup> and 1507 cm<sup>-1</sup>), SO<sub>3</sub> species (1460 cm<sup>-1</sup>), the stretching modes of surface absorbed sulfate species (1236 cm<sup>-1</sup> and 1151 cm<sup>-1</sup>), separately<sup>1-3</sup>. As shown in Fig. S3(b), the peaks located at 1545 cm<sup>-1</sup>, 1513 cm<sup>-1</sup>, 1262 cm<sup>-1</sup>, 1148 cm<sup>-1</sup> were appeared for CuAl-LDO/TiO<sub>2</sub>NTs catalyst. The peaks above could be assigned to the surface bidentate sulfate species (1540 cm<sup>-1</sup> and 1507 cm<sup>-1</sup>) and the stretching modes of surface absorbed sulfate species (1236 cm<sup>-1</sup> and 1151 cm<sup>-1</sup>)<sup>1,2</sup>.

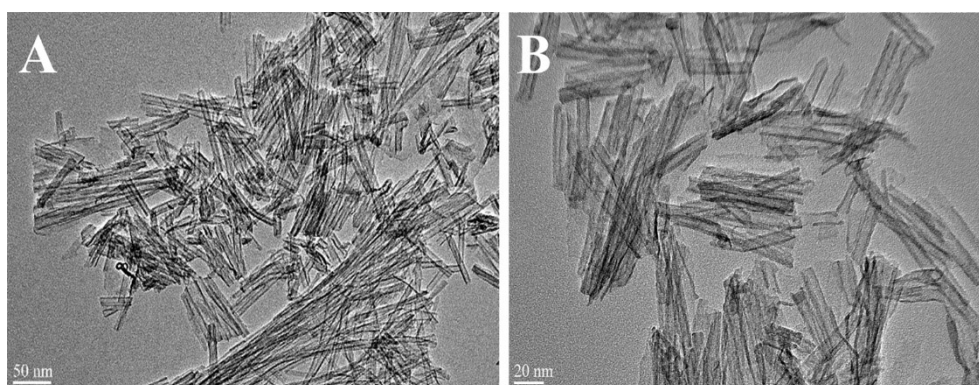

**Fig. S4** The TEM images of TiO<sub>2</sub>NTs (A, B).

The TEM images of TiO<sub>2</sub>NTs are showed in Fig. S4 (A) and (B). It can be seen from the Fig. S4 that TiO<sub>2</sub>NTs has a regular morphology and a complete hollow tubular structure. The wall of nanotube was smooth, no particles are attached to the surface. The diameter of the tube was uniform (about 10 nm), and the length was greater than 100 nm.

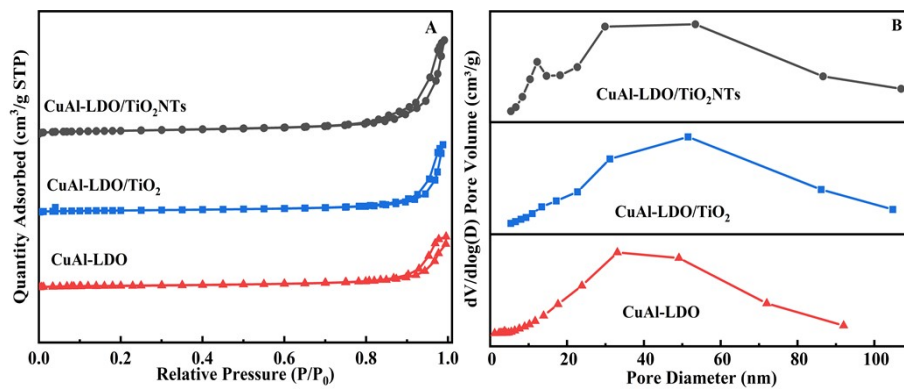

Fig. S5 (A)  $N_2$  adsorption/desorption isotherms and (B) pore diameter distribution of catalysts

## References

- 1 L. Zhao, X. Li, C. Hao and C. L. Raston, *Appl. Catal. B-Environ.*, 2012, **117-118**, 339–345.
- 2 H. Abdulhamid, E. Fridell, J. Dawody and M. Skoglundh, *J. Catal.*, 2006, **241**, 200–210.
- 3 B. Q. Jiang, Z. B. Wu, Y. Liu, S. C. Lee and W. K. Ho, *J. Phys. Chem. C*, 2010, **114**, 4961–4965.
